# Supplementary material for: Circular RNA circMRPS35 represses malignant progression in osteosarcoma cells via targeting miR-105-5p/FOXO1
Source: publisher site journal article supplement (doi:10.18632/aging.206022), 2024-08-05
Supplement: Supplementary file [file aging-v16i15-206022-supplementary-material-SD1.pdf]

**SUPPLEMENTARY FIGURE**

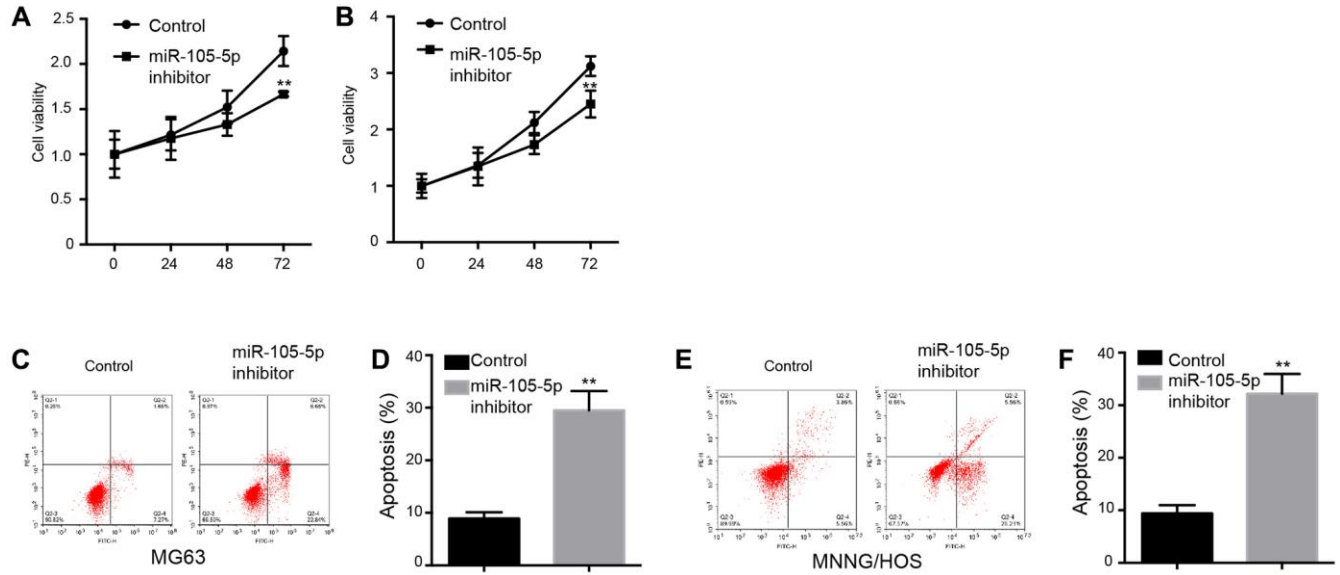

**Supplementary Figure 1. The inhibition of miR-105-5p reduces viability and induces apoptosis of osteosarcoma cells. (A–F)** The MG63 and MNNG/HOS cells were treated with miR-105-5p inhibitor. **(A, B)** The cell viability was measured by CCK-8 assay. **(C–F)** The cell apoptosis was analyzed by flow cytometry analysis. \*\* $P < 0.01$ .
